# Supplementary material for: District-Level Risk Factors for COVID-19 Incidence and Mortality in Nepal
Source: MDPI journal article supplement (doi:10.3390/ijerph19052659), 2022-02-24
Supplement: s1 [file s1]

## Supplementary materials

# District-level Risk Factors for COVID-19 Incidence and Mortality in Nepal

Dirga Kumar Lamichhane <sup>1,\*</sup>, Sabina Shrestha <sup>2</sup> and Hwan-Cheol Kim <sup>1</sup>

<sup>1</sup> Department of Occupational and Environmental Medicine, School of Medicine, Inha University, Incheon 22212, South Korea; carpediem@inha.ac.kr

<sup>2</sup> Department of Community and Global Health, Graduate School of Medicine, The University of Tokyo, Tokyo 113-0033, Japan; sabinashrestha2001@yahoo.com

\* Correspondence: dirgalamichhane@gmail.com

**Table S1.** District-wise COVID-19 cases in Nepal (January 23, 2020 to January 22, 2021).

| Country/ District | Province | Confirmed cases <sup>a</sup> | Recovered cases <sup>a</sup> | Deceased cases <sup>a</sup> | Population projected 2021 <sup>b</sup> | Rate of cases <sup>c</sup> | Rate of recovered cases <sup>c</sup> | Rate of deaths <sup>c</sup> |
|-------------------|----------|------------------------------|------------------------------|-----------------------------|----------------------------------------|----------------------------|--------------------------------------|-----------------------------|
| NEPAL             |          | 268948                       | 263546                       | 1986                        | 30526143                               | 881.042                    | 863.345                              | 6.506                       |
| Jhapa             | One      | 5033                         | 4993                         | 23                          | 939491                                 | 535.716                    | 531.458                              | 2.448                       |
| Terhathum         | One      | 164                          | 155                          | 1                           | 100495                                 | 163.192                    | 154.237                              | 0.995                       |
| Taplejung         | One      | 161                          | 160                          | 0                           | 130992                                 | 122.908                    | 122.145                              | 0                           |
| Udayapur          | One      | 682                          | 669                          | 2                           | 360705                                 | 189.074                    | 185.470                              | 0.554                       |
| Okhaldhunga       | One      | 279                          | 272                          | 3                           | 151762                                 | 183.840                    | 179.228                              | 1.977                       |
| Sankhuwasabha     | One      | 399                          | 392                          | 3                           | 155292                                 | 256.935                    | 252.428                              | 1.932                       |
| Panchthar         | One      | 192                          | 179                          | 8                           | 197440                                 | 97.245                     | 90.660                               | 4.052                       |
| Bhojpur           | One      | 166                          | 163                          | 3                           | 152216                                 | 109.056                    | 107.085                              | 1.971                       |
| Sunsari           | One      | 9145                         | 9111                         | 26                          | 931436                                 | 981.817                    | 978.167                              | 2.791                       |
| Khotang           | One      | 224                          | 220                          | 0                           | 169630                                 | 132.052                    | 129.694                              | 0                           |
| Ilam              | One      | 495                          | 482                          | 5                           | 314201                                 | 157.542                    | 153.405                              | 1.591                       |
| Dhankuta          | One      | 278                          | 269                          | 5                           | 171841                                 | 161.777                    | 156.540                              | 2.910                       |
| Morang            | One      | 13236                        | 13166                        | 58                          | 1108654                                | 1193.880                   | 1187.566                             | 5.232                       |
| Solukhumbu        | One      | 207                          | 204                          | 2                           | 101726                                 | 203.488                    | 200.539                              | 1.966                       |
| Parsa             | Two      | 3513                         | 3449                         | 50                          | 729291                                 | 481.701                    | 472.925                              | 6.856                       |
| Mahotari          | Two      | 2073                         | 2041                         | 29                          | 719181                                 | 288.245                    | 283.795                              | 4.032                       |
| Saptari           | Two      | 2187                         | 2141                         | 13                          | 719000                                 | 304.172                    | 297.775                              | 1.808                       |
| Dhanusa           | Two      | 3131                         | 3097                         | 29                          | 852097                                 | 367.446                    | 363.456                              | 3.403                       |
| Sarlahi           | Two      | 2861                         | 2841                         | 18                          | 909891                                 | 314.433                    | 312.235                              | 1.978                       |
| Bara              | Two      | 2182                         | 2153                         | 21                          | 846772                                 | 257.684                    | 254.260                              | 2.480                       |
| Siraha            | Two      | 2294                         | 2270                         | 20                          | 711146                                 | 322.578                    | 319.203                              | 2.812                       |
| Rautahat          | Two      | 2819                         | 2785                         | 30                          | 862993                                 | 326.654                    | 322.714                              | 3.476                       |
| Nuwakot           | Bagmati  | 1530                         | 1456                         | 17                          | 288328                                 | 530.646                    | 504.980                              | 5.896                       |
| Rasuwa            | Bagmati  | 238                          | 227                          | 1                           | 45200                                  | 526.549                    | 502.212                              | 2.212                       |
| Kavre             | Bagmati  | 3642                         | 3584                         | 33                          | 404549                                 | 900.262                    | 885.925                              | 8.157                       |
| Dolakha           | Bagmati  | 802                          | 772                          | 10                          | 186871                                 | 429.173                    | 413.119                              | 5.351                       |
| Dhading           | Bagmati  | 1762                         | 1742                         | 8                           | 355975                                 | 494.979                    | 489.360                              | 2.247                       |
| Sindhuli          | Bagmati  | 660                          | 631                          | 4                           | 312448                                 | 211.235                    | 201.954                              | 1.280                       |
| Bhaktapur         | Bagmati  | 9245                         | 9139                         | 60                          | 377660                                 | 2447.969                   | 2419.902                             | 15.887                      |
| Sindhupalchowk    | Bagmati  | 1038                         | 1010                         | 16                          | 294736                                 | 352.180                    | 342.680                              | 5.429                       |
| Chitwan           | Bagmati  | 8065                         | 7953                         | 68                          | 711629                                 | 1133.315                   | 1117.577                             | 9.556                       |
| Kathmandu         | Bagmati  | 103523                       | 100584                       | 738                         | 2300890                                | 4499.259                   | 4371.526                             | 32.075                      |
| Makwanpur         | Bagmati  | 4348                         | 4290                         | 42                          | 466612                                 | 931.823                    | 919.393                              | 9.001                       |
| Lalitpur          | Bagmati  | 16106                        | 15806                        | 69                          | 585982                                 | 2748.549                   | 2697.353                             | 11.775                      |
| Ramechhap         | Bagmati  | 590                          | 567                          | 19                          | 209248                                 | 281.962                    | 270.970                              | 9.080                       |
| Baglung           | Gandaki  | 1275                         | 1241                         | 7                           | 285119                                 | 447.182                    | 435.257                              | 2.455                       |
| Parbat            | Gandaki  | 546                          | 489                          | 28                          | 148448                                 | 367.806                    | 329.408                              | 18.862                      |
| Gorkha            | Gandaki  | 1550                         | 1490                         | 30                          | 243272                                 | 637.147                    | 612.483                              | 12.332                      |
| Tanahu            | Gandaki  | 1868                         | 1835                         | 13                          | 348724                                 | 535.667                    | 526.204                              | 3.728                       |
| Syangja           | Gandaki  | 1201                         | 1184                         | 10                          | 246315                                 | 487.587                    | 480.685                              | 4.060                       |
| Kaski             | Gandaki  | 7668                         | 7544                         | 20                          | 597988                                 | 1282.300                   | 1261.564                             | 3.345                       |
| Lamjung           | Gandaki  | 1142                         | 1127                         | 2                           | 172158                                 | 663.344                    | 654.631                              | 1.162                       |
| Myagdi            | Gandaki  | 302                          | 278                          | 2                           | 110419                                 | 273.504                    | 251.768                              | 1.811                       |
| Manang            | Gandaki  | 20                           | 15                           | 1                           | 6284                                   | 318.269                    | 238.702                              | 15.913                      |
| Mustang           | Gandaki  | 43                           | 42                           | 0                           | 11240                                  | 382.562                    | 373.666                              | 0                           |
| Banke             | Lumbini  | 5123                         | 4960                         | 45                          | 621921                                 | 823.738                    | 797.529                              | 7.236                       |
| Palpa             | Lumbini  | 2246                         | 2214                         | 2                           | 246206                                 | 912.244                    | 899.247                              | 0.812                       |
| Kapilbastu        | Lumbini  | 2314                         | 2262                         | 14                          | 680984                                 | 339.802                    | 332.166                              | 2.056                       |
| Rupandehi         | Lumbini  | 9708                         | 9496                         | 93                          | 1091034                                | 889.798                    | 870.367                              | 8.524                       |
| Gulmi             | Lumbini  | 1244                         | 1208                         | 12                          | 252731                                 | 492.223                    | 477.979                              | 4.748                       |
| Bardiya           | Lumbini  | 2004                         | 1927                         | 50                          | 486334                                 | 412.063                    | 396.230                              | 10.281                      |
| Pyuthan           | Lumbini  | 1103                         | 1076                         | 15                          | 243816                                 | 452.390                    | 441.316                              | 6.152                       |
| Arghakhanchi      | Lumbini  | 1049                         | 1023                         | 4                           | 202756                                 | 517.371                    | 504.547                              | 1.973                       |
| Rolpa             | Lumbini  | 341                          | 319                          | 4                           | 239145                                 | 142.591                    | 133.392                              | 1.673                       |
| Dang              | Lumbini  | 4189                         | 4119                         | 6                           | 660742                                 | 633.984                    | 623.390                              | 0.908                       |
| Jumla             | Karnali  | 475                          | 454                          | 2                           | 127214                                 | 373.387                    | 356.879                              | 1.572                       |
| Salyan            | Karnali  | 665                          | 656                          | 5                           | 276060                                 | 240.890                    | 237.630                              | 1.811                       |

|                          |              |      |      |    |        |         |         |        |
|--------------------------|--------------|------|------|----|--------|---------|---------|--------|
| Surkhet                  | Karnali      | 2514 | 2492 | 13 | 426673 | 589.210 | 584.054 | 3.047  |
| Jajarkot                 | Karnali      | 123  | 119  | 1  | 201913 | 60.917  | 58.936  | 0.495  |
| Dolpa                    | Karnali      | 60   | 55   | 2  | 43058  | 139.347 | 127.735 | 4.645  |
| Dailekha                 | Karnali      | 1666 | 1655 | 6  | 302085 | 551.500 | 547.859 | 1.986  |
| Humla                    | Karnali      | 44   | 37   | 4  | 59800  | 73.579  | 61.873  | 6.689  |
| Mugu                     | Karnali      | 37   | 35   | 2  | 65102  | 56.834  | 53.762  | 3.072  |
| Kalikot                  | Karnali      | 295  | 292  | 3  | 162277 | 181.788 | 179.939 | 1.849  |
| Doti                     | Sudurpachhim | 1448 | 1444 | 1  | 213465 | 678.331 | 676.458 | 0.468  |
| Baitadi                  | Sudurpachhim | 735  | 706  | 3  | 267932 | 274.323 | 263.500 | 1.120  |
| Dadeldhura               | Sudurpachhim | 793  | 776  | 2  | 160426 | 494.309 | 483.712 | 1.247  |
| Kanchanpur               | Sudurpachhim | 1948 | 1929 | 4  | 539119 | 361.330 | 357.806 | 0.742  |
| Darchula                 | Sudurpachhim | 426  | 409  | 15 | 145761 | 292.259 | 280.596 | 10.291 |
| Achham                   | Sudurpachhim | 1761 | 1754 | 4  | 291468 | 604.183 | 601.781 | 1.372  |
| Bajura                   | Sudurpachhim | 733  | 724  | 5  | 158078 | 463.695 | 458.002 | 3.163  |
| Kailali                  | Sudurpachhim | 6111 | 6036 | 34 | 971320 | 629.144 | 621.422 | 3.500  |
| Bajhang                  | Sudurpachhim | 1115 | 1079 | 12 | 225304 | 494.887 | 478.909 | 5.326  |
| Nawalparasi <sup>d</sup> | -            | 4742 | 4664 | 60 | 737968 | 642.575 | 632.006 | 8.130  |
| Rukum <sup>d</sup>       | -            | 381  | 360  | 15 | 231015 | 164.924 | 155.834 | 6.493  |

<sup>a</sup> Ministry of Health and Population. COVID-19 Update. Available from: <https://covid19.mohp.gov.np/>.

<sup>b</sup> National Population and Housing Census 2011 (Population Projection 2011–2031).

<sup>c</sup> Per 100,000 people.

<sup>d</sup> Nepal was divided into seven provinces in September 2015, and Nawalparasi and Rukum were split in two parts, ending up in two different provinces.

**Table 2.** Correlation coefficients among the variables.

| Variables                     | (1)    | (2)    | (3)    | (4)    | (5)    | (6)    | (7)    | (8)   |
|-------------------------------|--------|--------|--------|--------|--------|--------|--------|-------|
| (1) Population density        | 1.000  |        |        |        |        |        |        |       |
| (2) Household crowding        | −0.055 | 1.000  |        |        |        |        |        |       |
| (3) No handwashing facilities | −0.081 | −0.037 | 1.000  |        |        |        |        |       |
| (4) Obesity in women          | 0.579  | −0.345 | −0.177 | 1.000  |        |        |        |       |
| (5) Smoking in men            | −0.078 | 0.037  | 0.248  | −0.057 | 1.000  |        |        |       |
| (6) Percent of the elderly    | −0.125 | −0.065 | −0.088 | 0.078  | −0.053 | 1.000  |        |       |
| (7) Adult literacy            | −0.345 | 0.558  | 0.044  | −0.566 | 0.187  | −0.235 | 1.000  |       |
| (8) Cases per 100,000 people  | 0.871  | −0.106 | 0.001  | 0.714  | −0.033 | −0.060 | −0.525 | 1.000 |

**Table S3.** Linear regression results with population density as the single explanatory variable.

| Models                                      | $\beta$ | SE     | t-value | <i>p</i> value | Lower 95% | Upper 95% |
|---------------------------------------------|---------|--------|---------|----------------|-----------|-----------|
| <i>Model 1: Cases per 100,000</i>           |         |        |         |                |           |           |
| Population density                          | 0.949   | 0.064  | 14.92   | <0.001         | 0.822     | 1.076     |
| Intercept                                   | 247.96  | 42.80  | 5.79    | <0.001         | 162.62    | 333.30    |
| R-squared                                   |         | 0.759  |         |                |           |           |
| <i>Model 2: Recovered cases per 100,000</i> |         |        |         |                |           |           |
| Population density                          | 0.928   | 0.063  | 14.82   | <0.001         | 0.803     | 1.053     |
| Intercept                                   | 242.84  | 42.12  | 14.82   | <0.001         | 158.85    | 326.83    |
| R-squared                                   |         | 0.752  |         |                |           |           |
| <i>Model 3: Deaths per 100,000</i>          |         |        |         |                |           |           |
| Population density                          | 0.006   | 0.0007 | 8.83    | <0.001         | 0.005     | 0.007     |
| Intercept                                   | 2.63    | 0.457  | 5.75    | <0.001         | 1.72      | 3.54      |
| R-squared                                   |         | 0.517  |         |                |           |           |

SE, standard error.

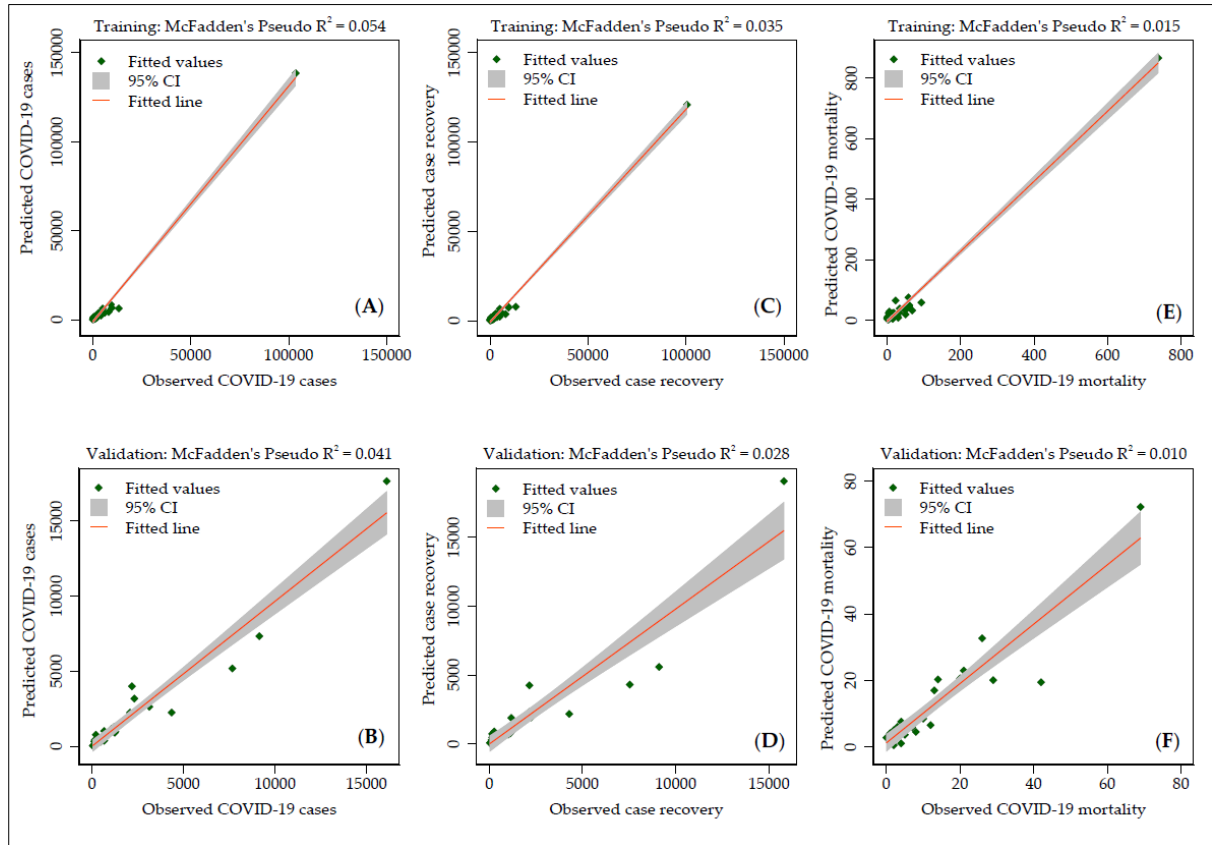

**Figure S1.** Scatter plot of observed and predicted COVID-19 cases (A and B), recovered cases (C and D), and mortality (E and F) for training and validation datasets using the negative binomial regression.  $R^2$  is adjusted  $R^2$  values.
